# Supplementary material for: Targeting tumor-stroma communication by blocking endothelin-1 receptors sensitizes high-grade serous ovarian cancer to PARP inhibition
Source: Springer Nature journal article supplement (doi:10.1038/s41419-022-05538-6), 2023-01-05

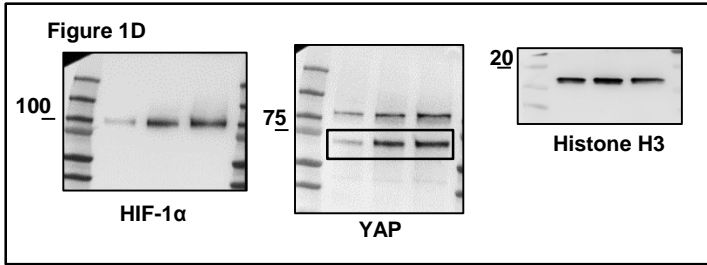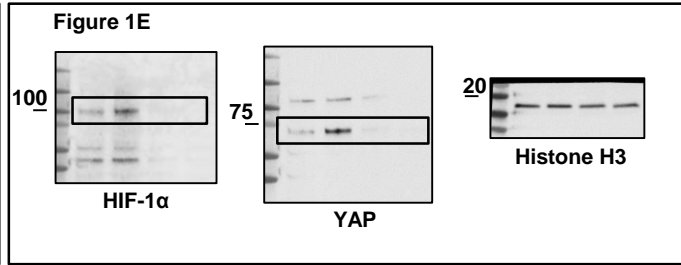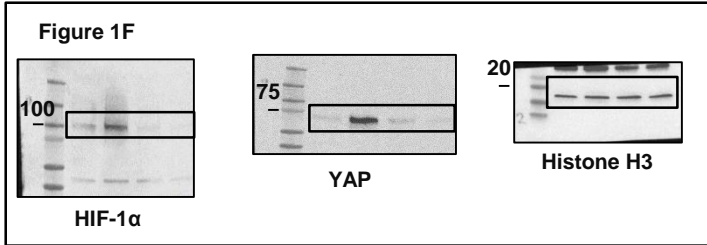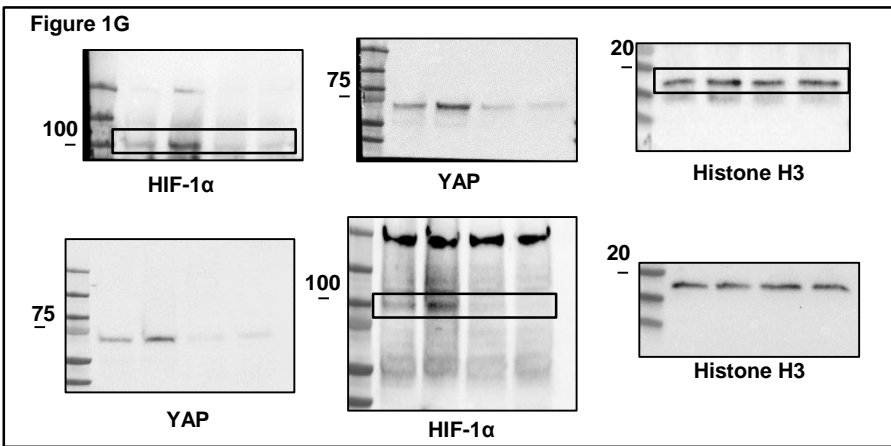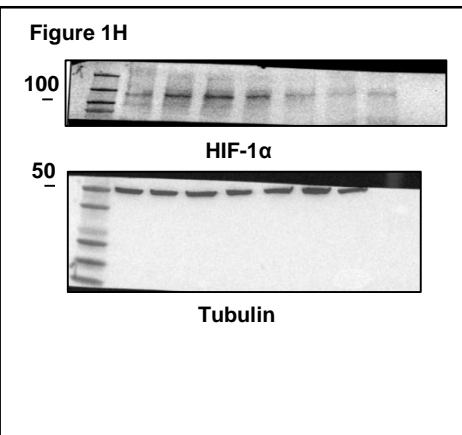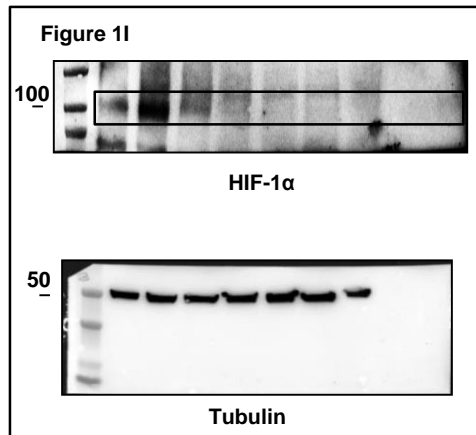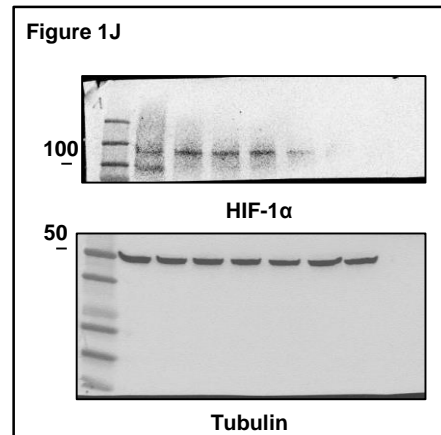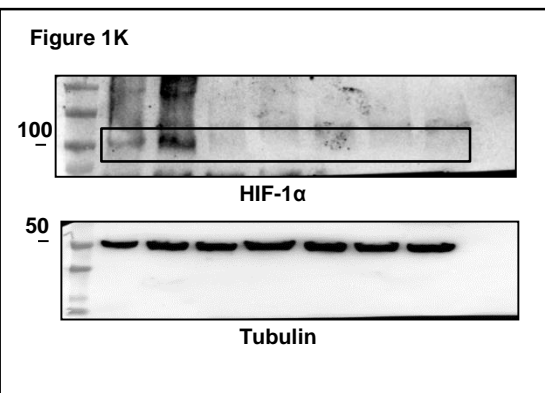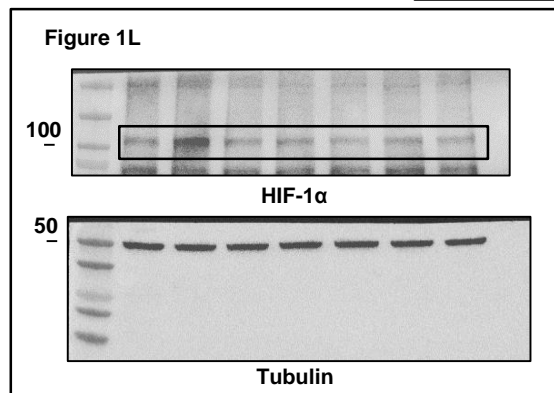

Figure 2C

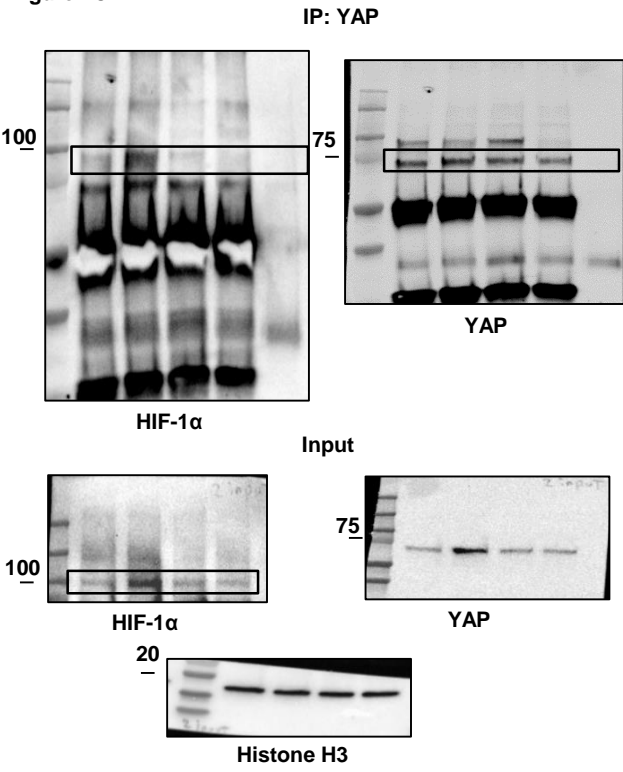

Figure 2D

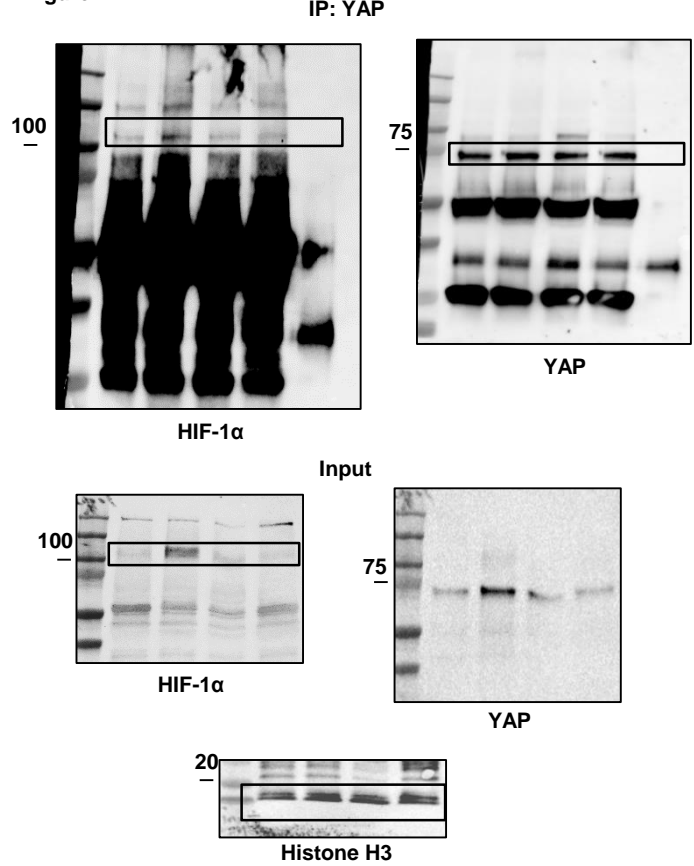

Figure 3A

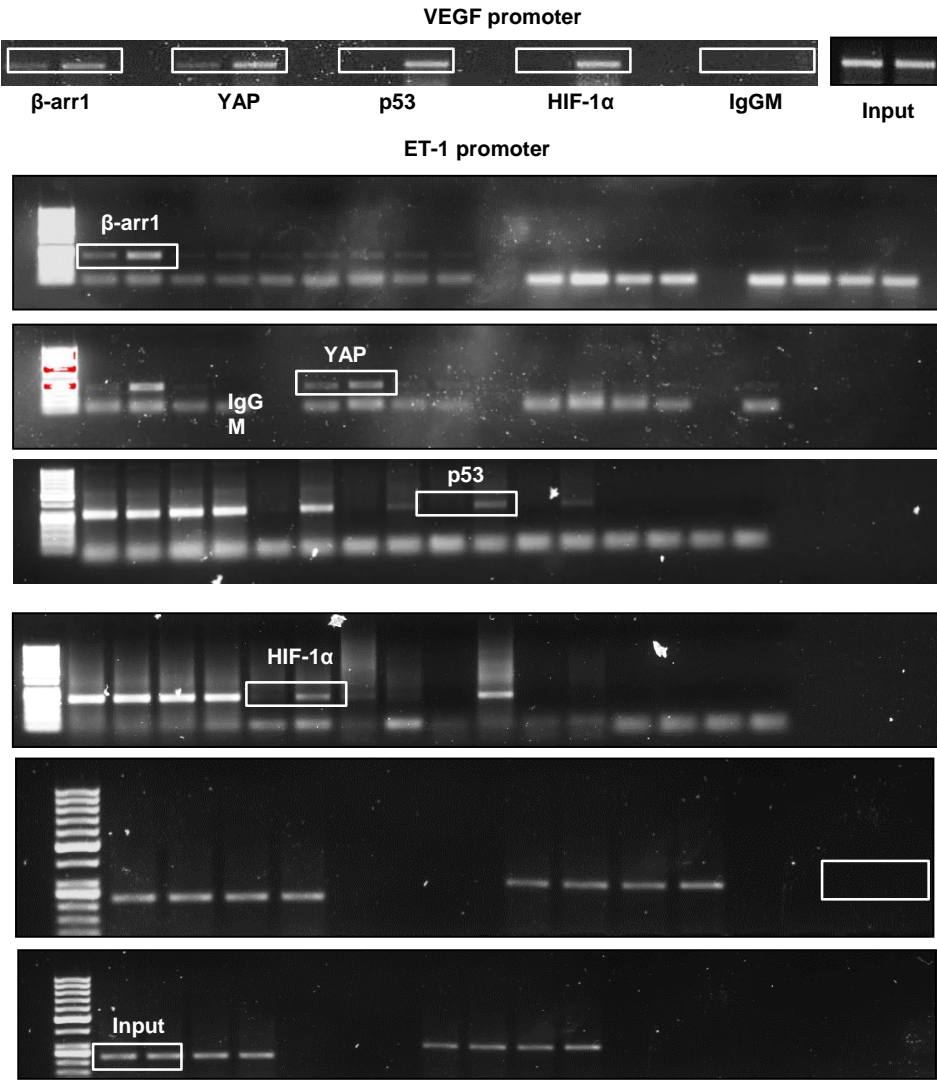

Figure 4A

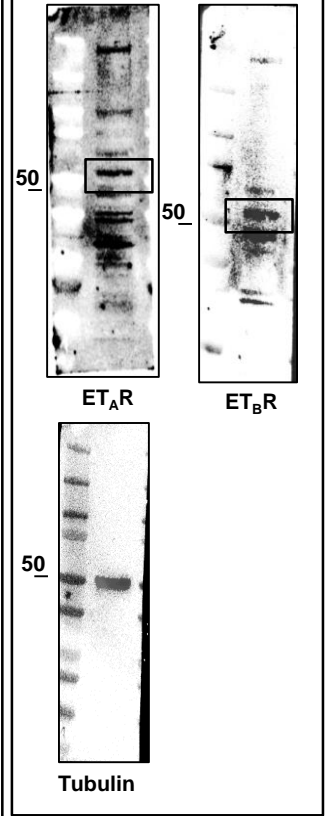

Figure 4B

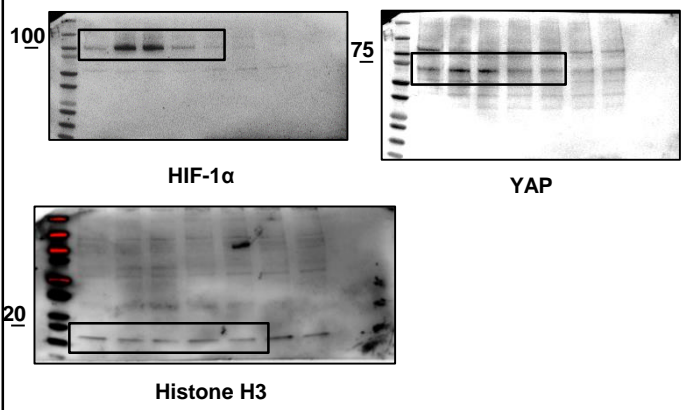

Figure 4D

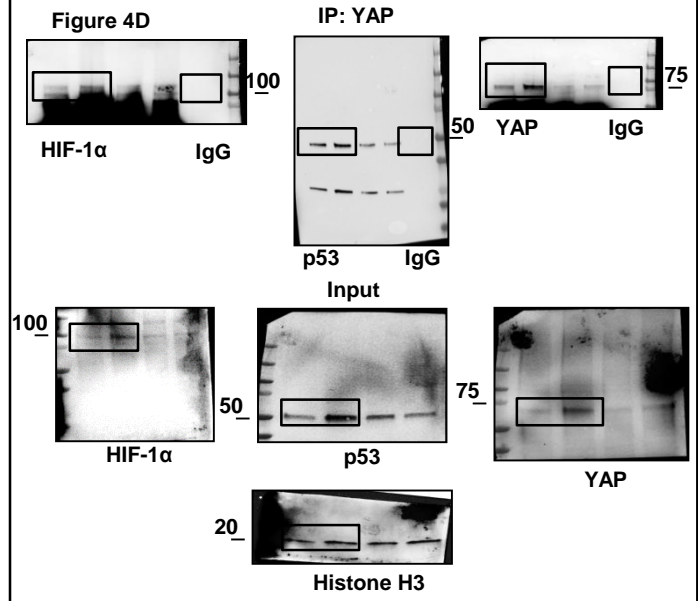

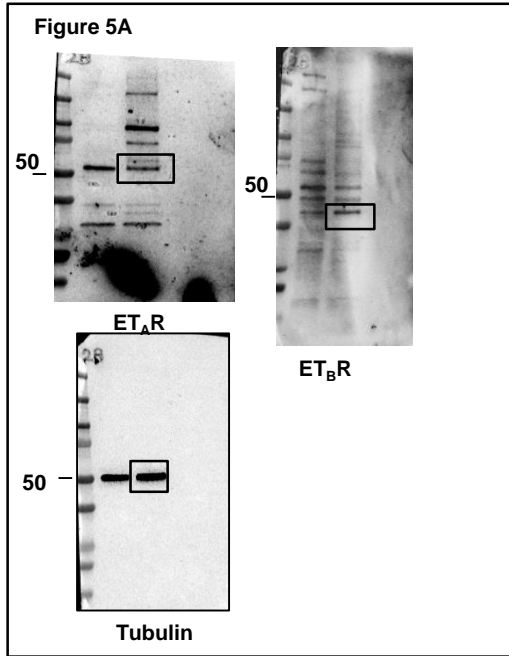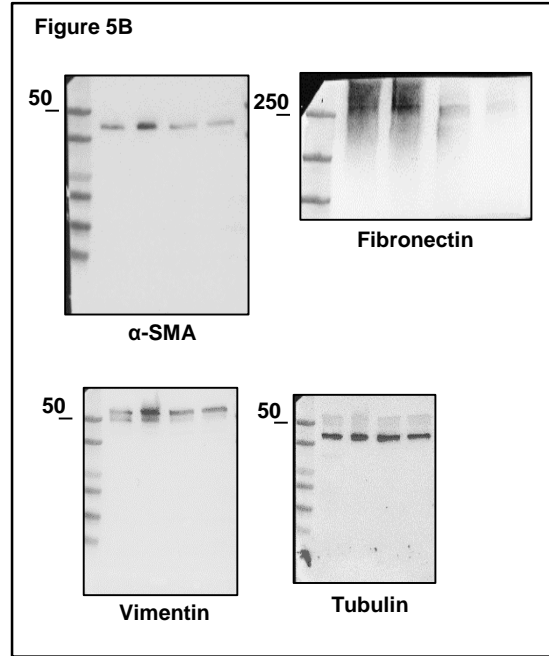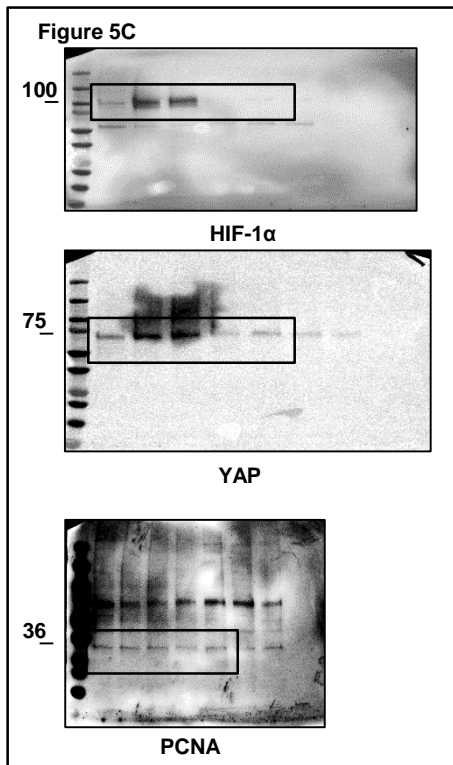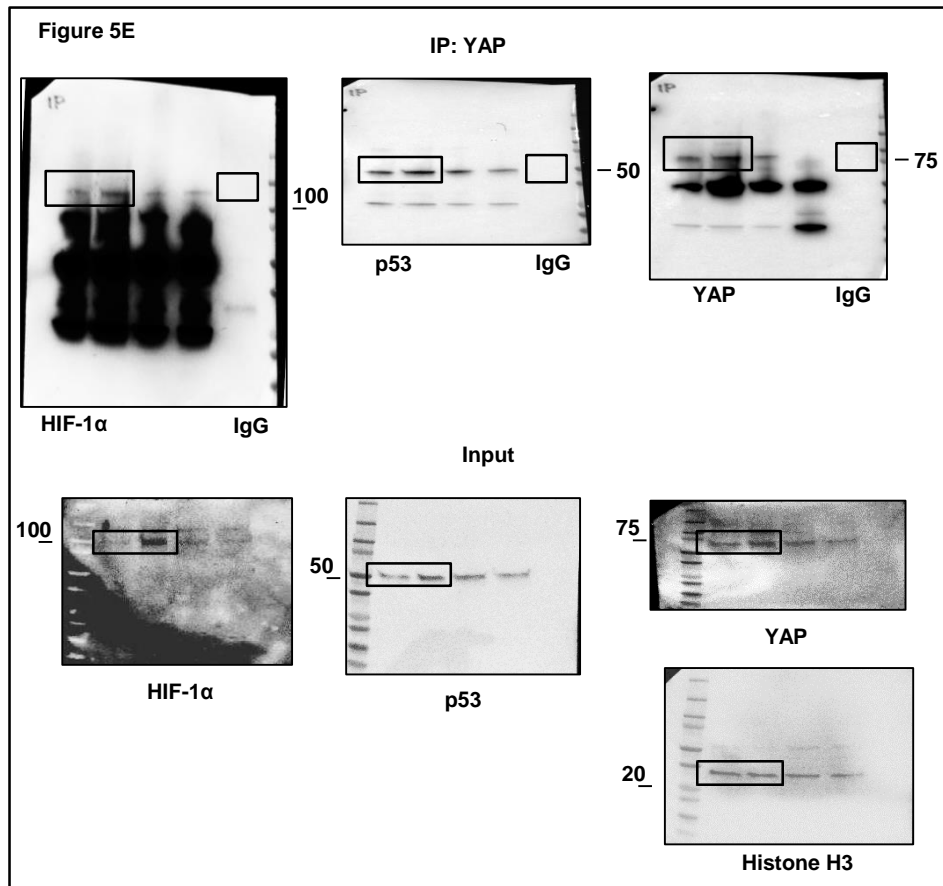

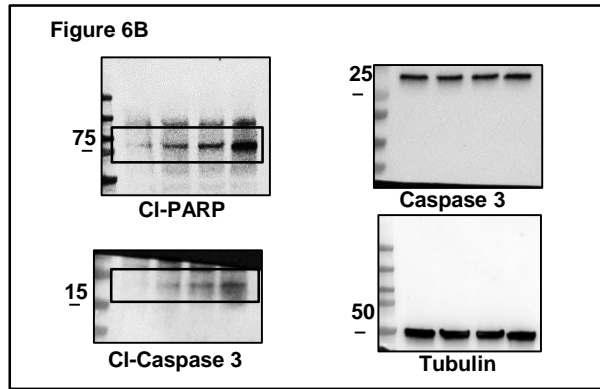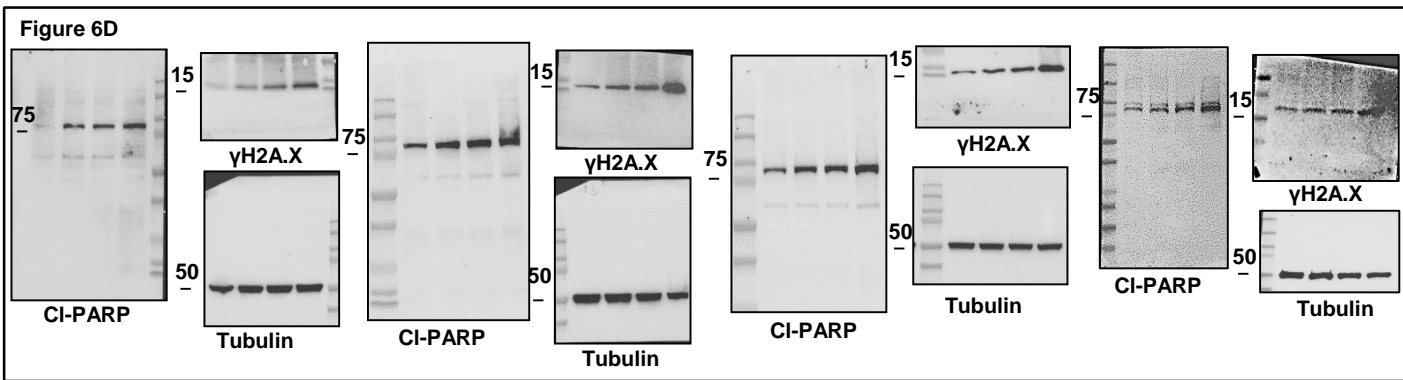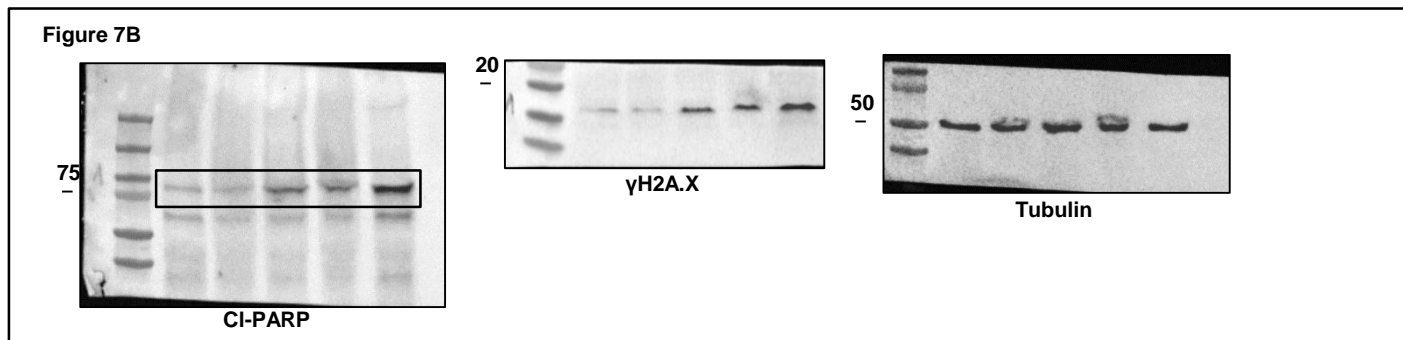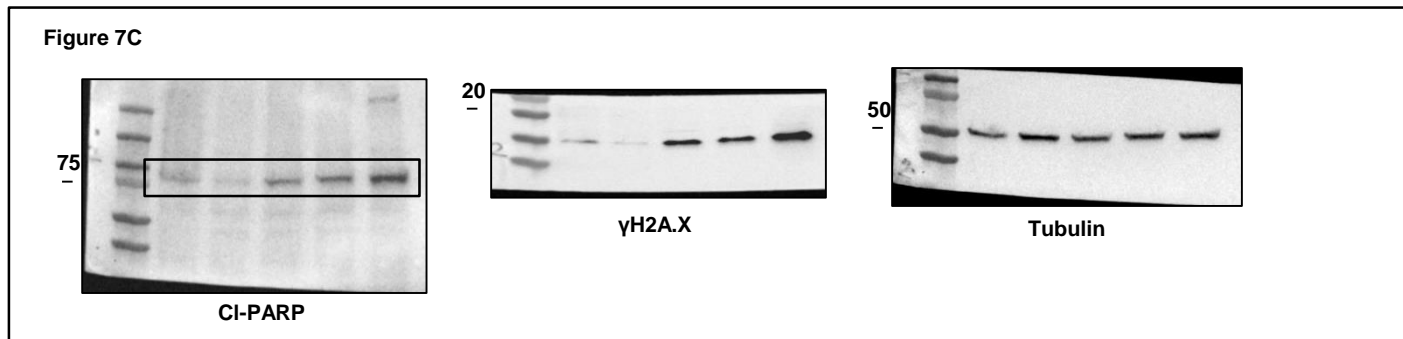

Figure 8C

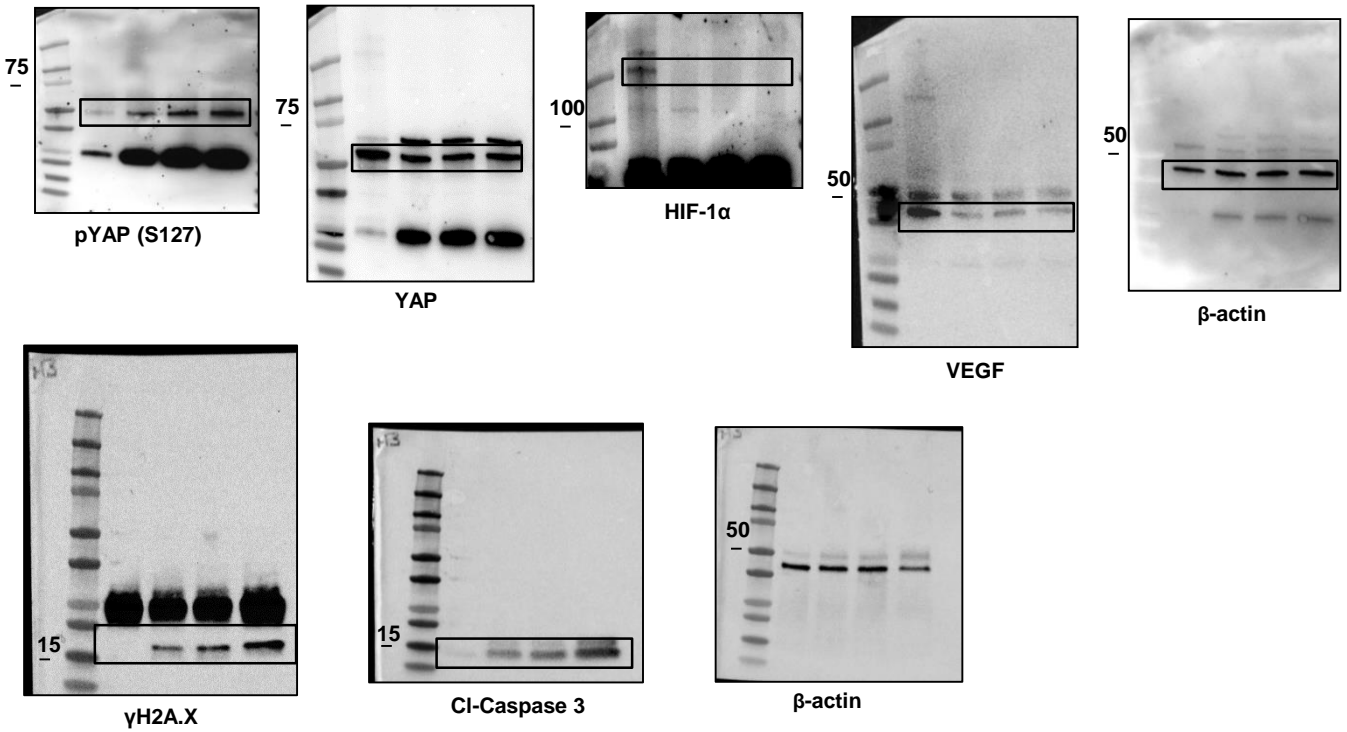

Figure 8E

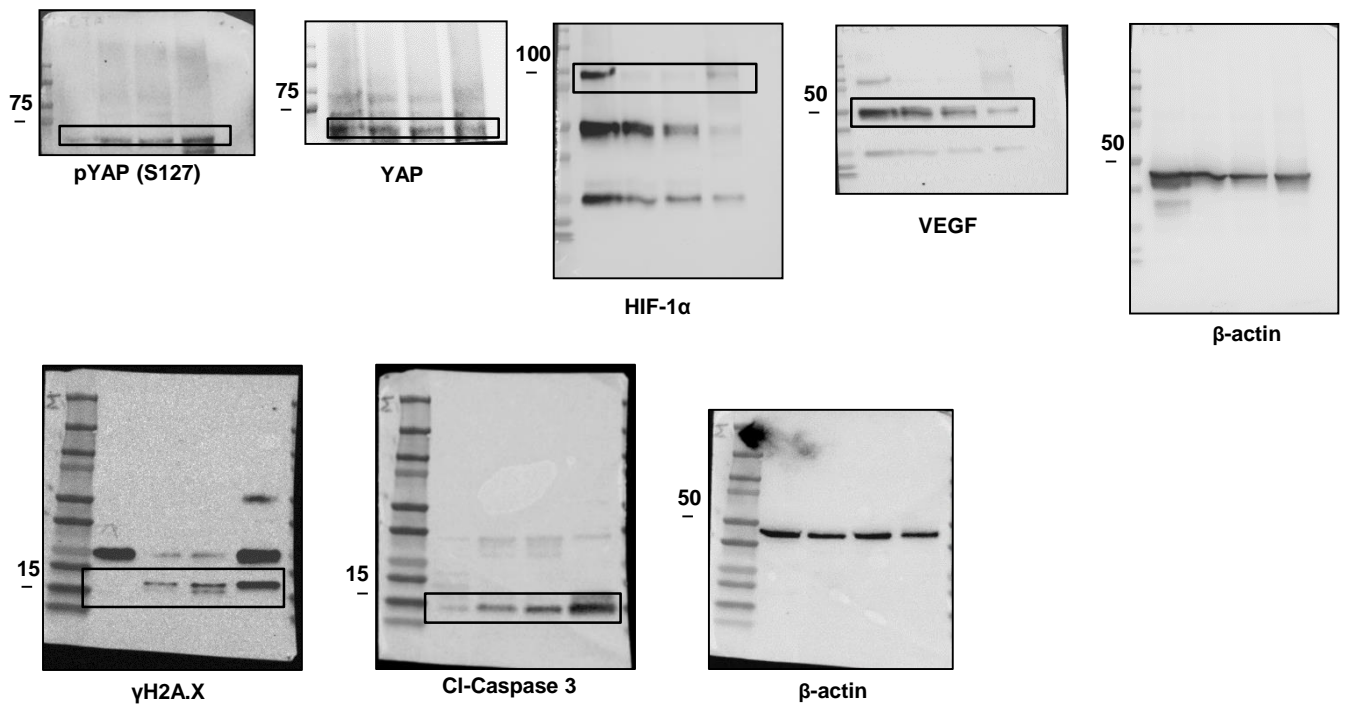

# Uncropped Blots Supplementary Fig. 1

Supplementary Figure 1A

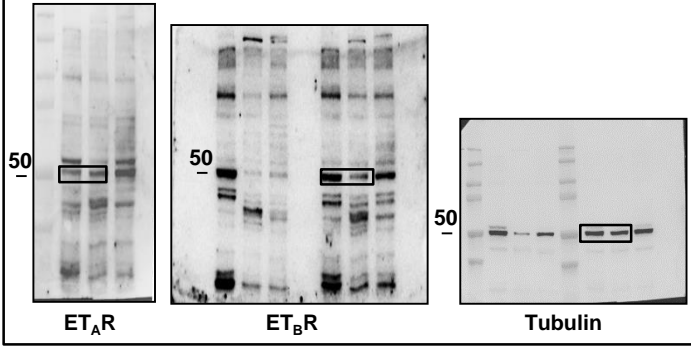

Supplementary Figure 1E

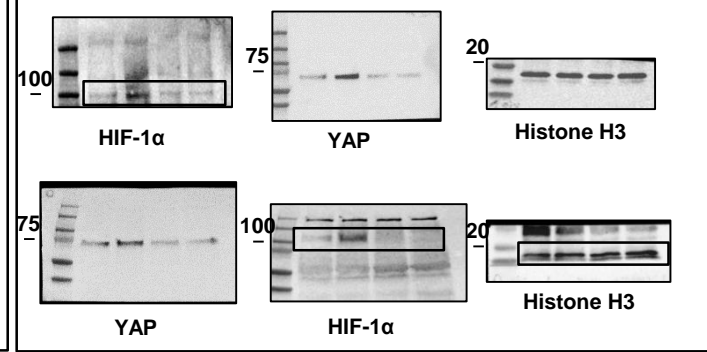

Supplementary Figure 1F

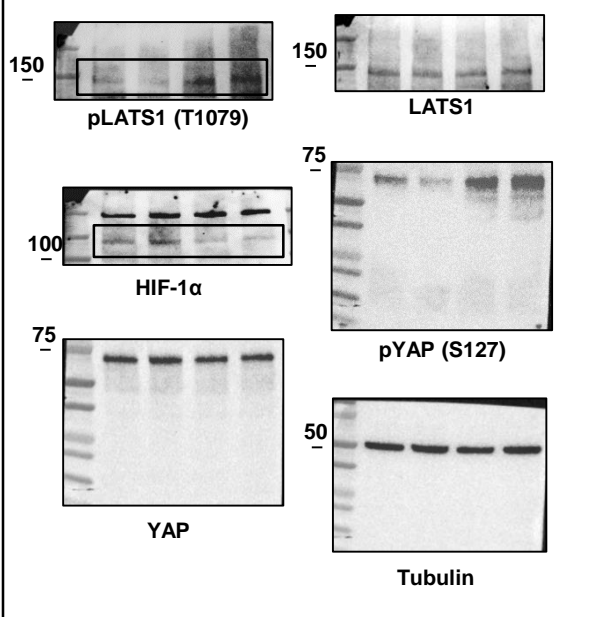

Supplementary Figure 1G

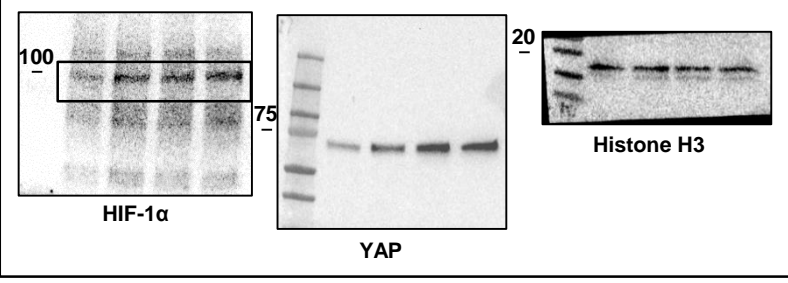

Supplementary Figure 1H

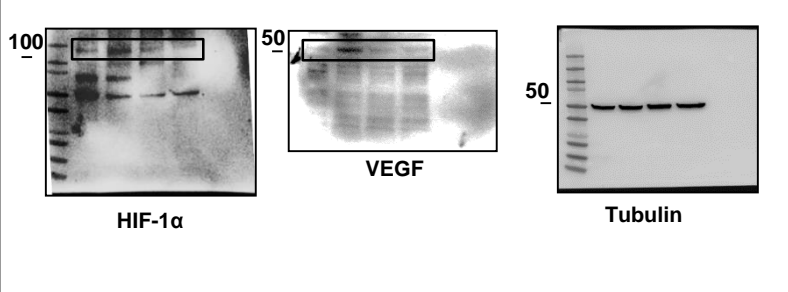

Supplementary Figure 1I

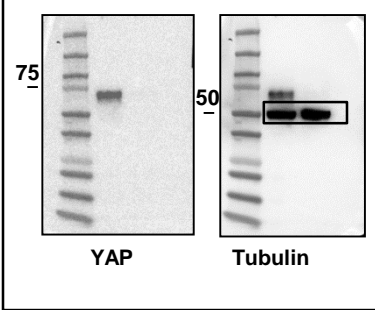

Supplementary Figure 1J

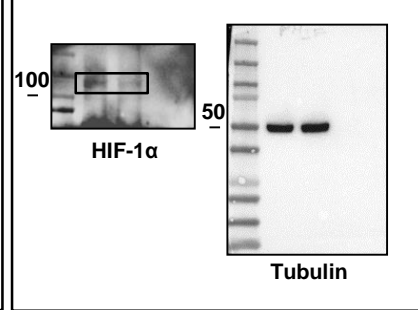

Supplementary Figure 1K

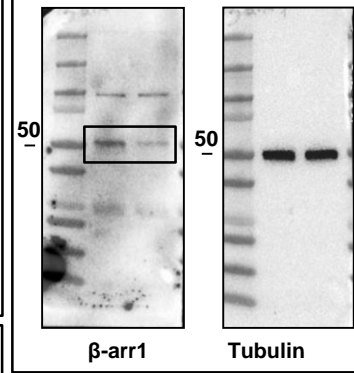

Supplementary Figure 1L

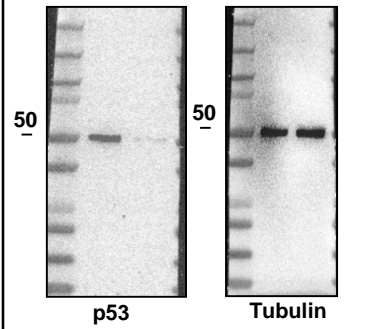

Supplementary Figure 1M

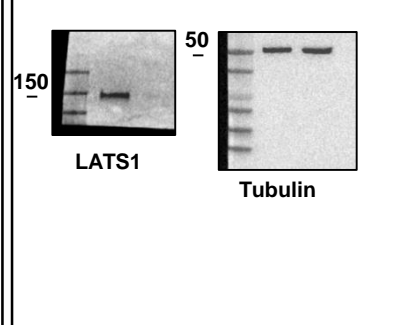

# Uncropped Blots Supplementary Fig. 2

Figure 2A

IP: YAP

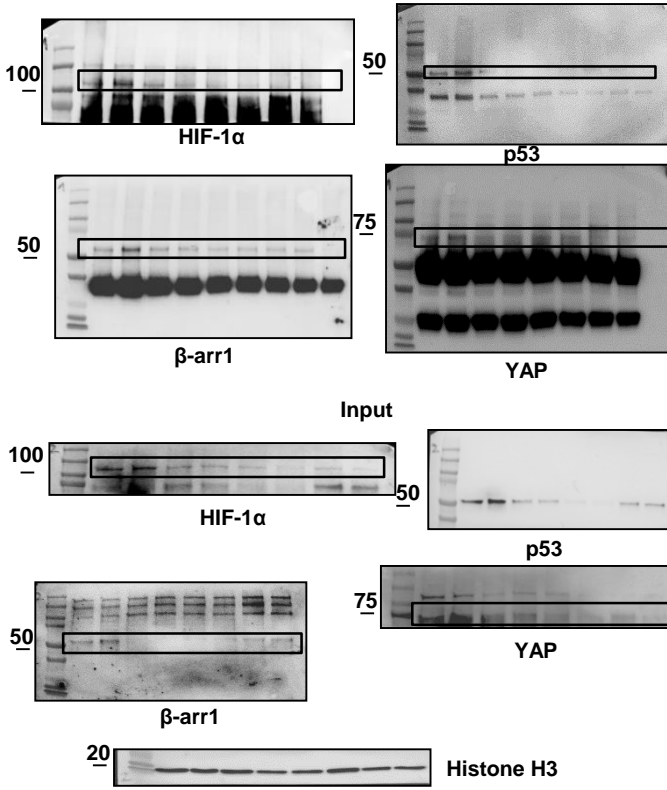

Figure 2B

IP: HIF-1 $\alpha$

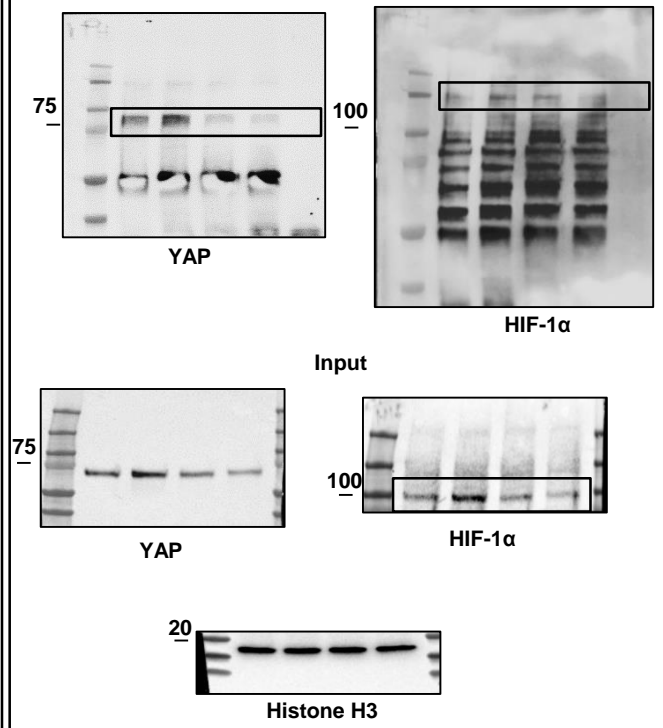

Supplementary Figure 2C

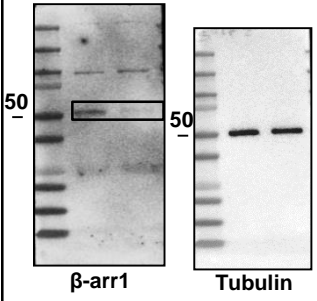

Supplementary Figure 2D

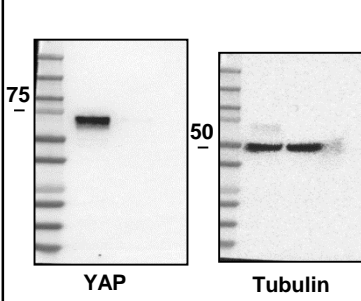

Supplementary Figure 2E

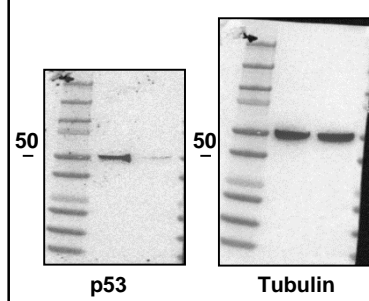

Supplementary Figure 2F

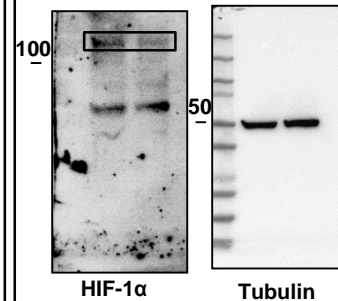



# Uncropped Blots Supplementary Fig. 4-5

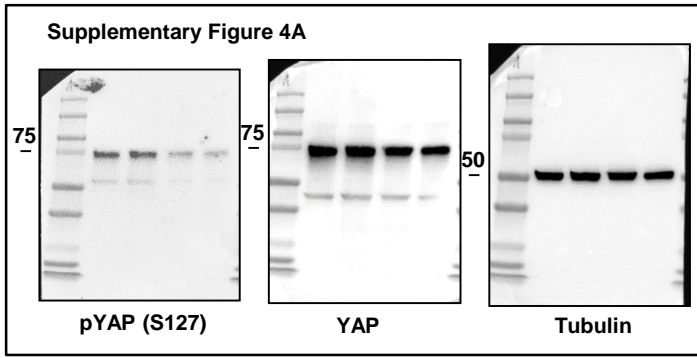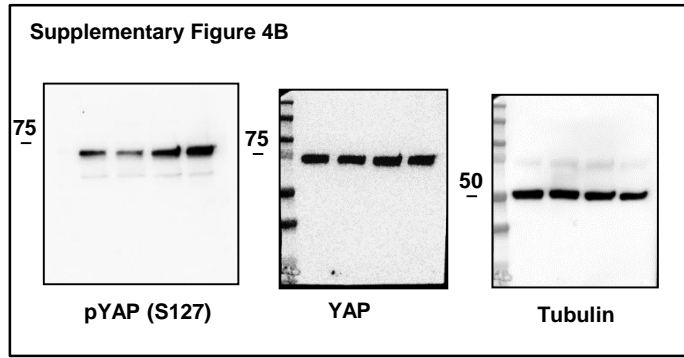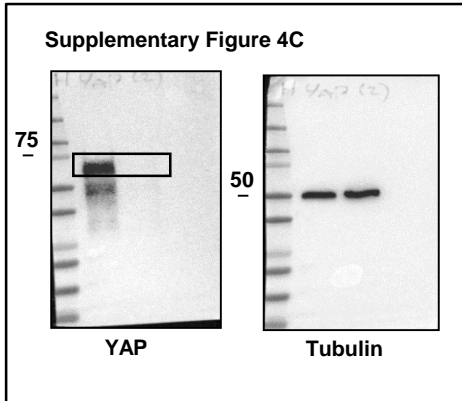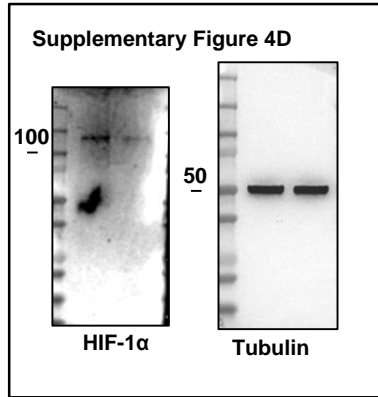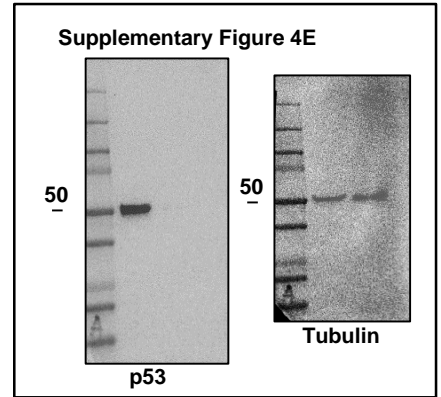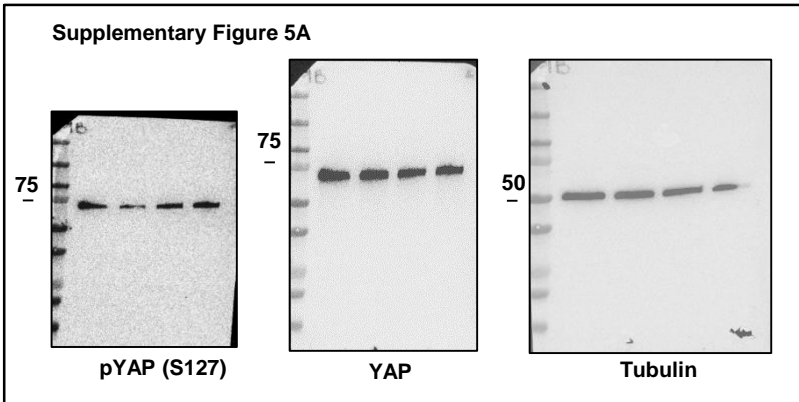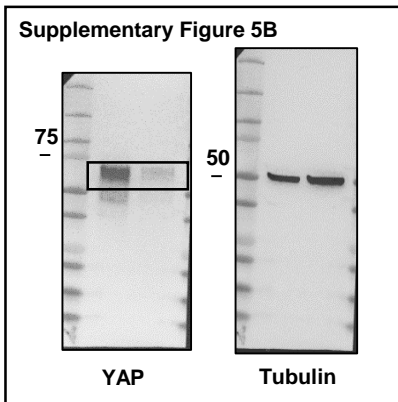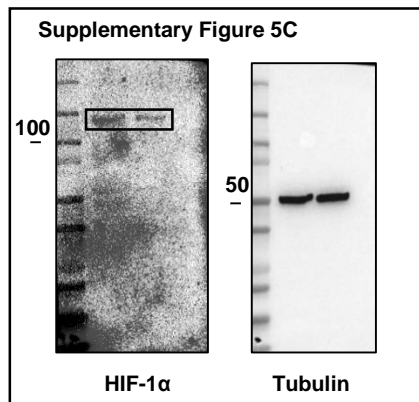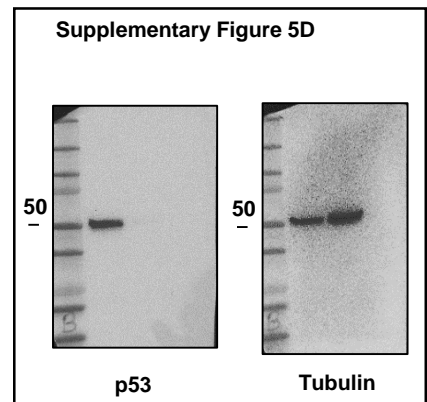

# Uncropped Blots Supplementary Fig. 6

Supplementary Figure 6C

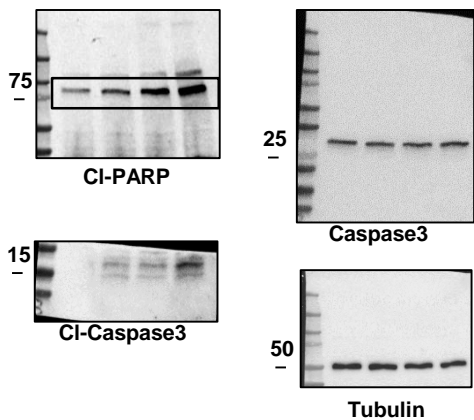

Supplementary Figure 6D

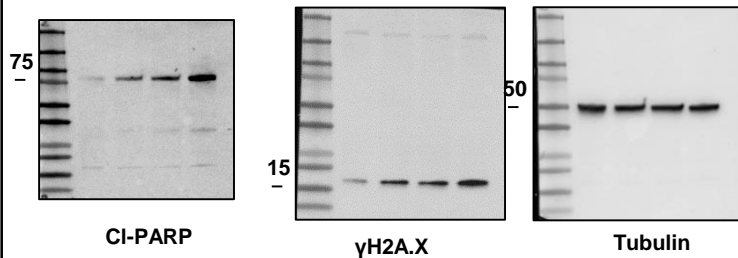

Supplementary Figure 6H

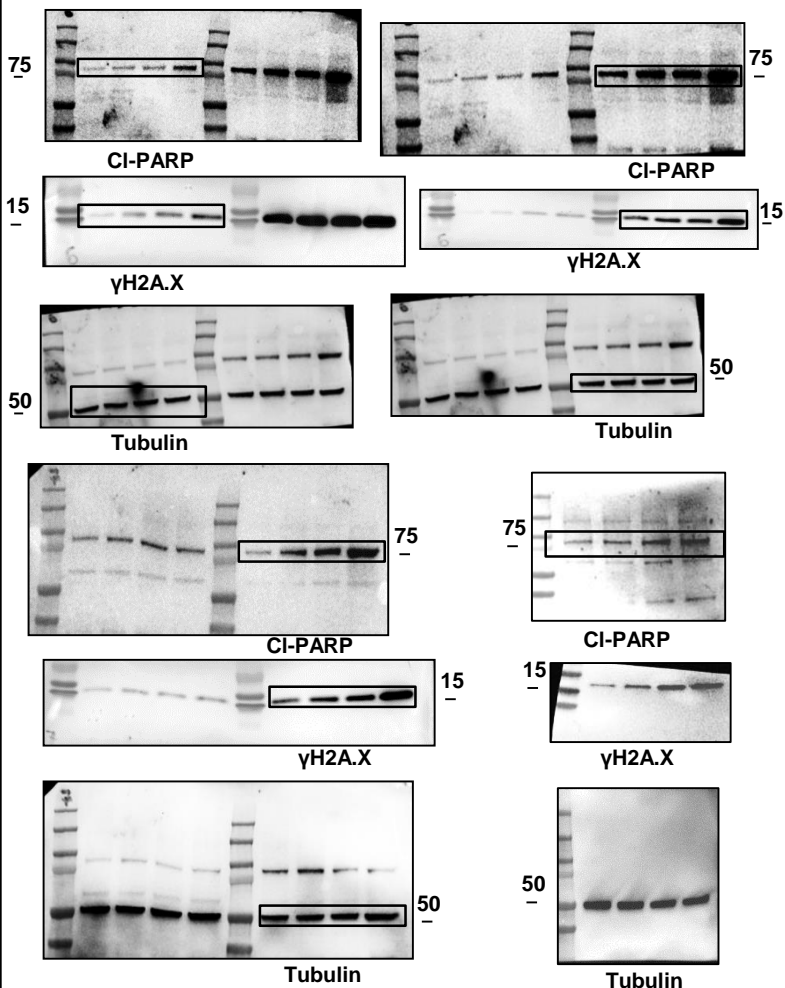

Supplementary Figure 6E

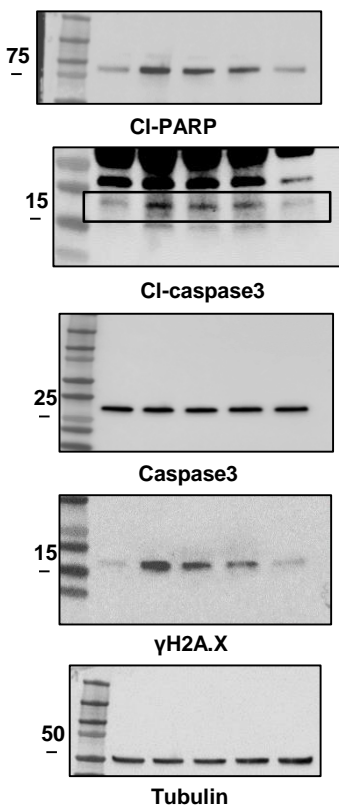

Supplementary Figure 6F

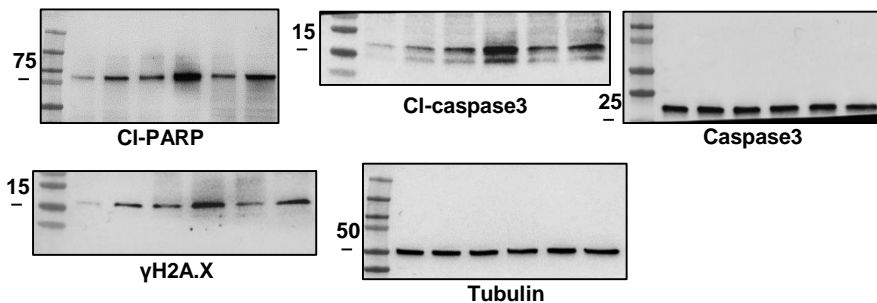

Supplement: 41419_2022_5538_MOESM3_ESM.pdf [file 41419_2022_5538_MOESM3_ESM.pdf]
