# Supplementary material for: Targeting tumor-stroma communication by blocking endothelin-1 receptors sensitizes high-grade serous ovarian cancer to PARP inhibition
Source: Springer Nature journal article supplement (doi:10.1038/s41419-022-05538-6), 2023-01-05
Supplement: 41419_2022_5538_MOESM1_ESM.pdf [file 41419_2022_5538_MOESM1_ESM.pdf]

## Supplementary Figures

### **Targeting tumor-stroma communication by blocking endothelin-1 receptors sensitizes high-grade serous ovarian cancer to PARP inhibition**

Piera Tocci<sup>1\*</sup>, Celia Roman<sup>1</sup>, Rosanna Sestito<sup>1</sup>, Valeriana Di Castro<sup>1</sup>, Andrea Sacconi<sup>2</sup>, Ivan Molineris<sup>3</sup>, Francesca Paolini<sup>4</sup>, Mariantonia Carosi<sup>5</sup>, Giovanni Tonon<sup>6,7</sup>, Giovanni Blandino<sup>2</sup> and Anna Bagnato<sup>1\*</sup>

<sup>1</sup>Preclinical Models and New Therapeutic Agents Unit, Istituto di Ricovero e Cura a Carattere Scientifico (IRCCS), Regina Elena National Cancer Institute, Rome, Italy; <sup>2</sup>Translational Oncology Research Unit, IRCCS, Regina Elena National Cancer Institute, Rome, Italy; <sup>3</sup>Department of Life Science and System Biology, University of Turin, Turin, Italy; <sup>4</sup>Tumor Immunology and Immunotherapy Unit, IRCCS, Regina Elena National Cancer Institute, Rome, Italy; <sup>5</sup>Pathology Unit, Department of Research, Diagnosis and Innovative Technologies, IRCCS, Regina Elena National Cancer Institute, Rome, Italy; <sup>6</sup>Center for Omics Sciences (COSR) and Functional Genomics of Cancer Unit, Division of Experimental Oncology, IRCCS San Raffaele Scientific Institute, Milan, Italy; <sup>7</sup>Università Vita-Salute San Raffaele, 20132, Milan, Italy.

\*Correspondence and requests for materials should be addressed to Anna Bagnato (email: annateresa.bagnato@ifo.it) or to Piera Tocci (email: piera.tocci@ifo.it)

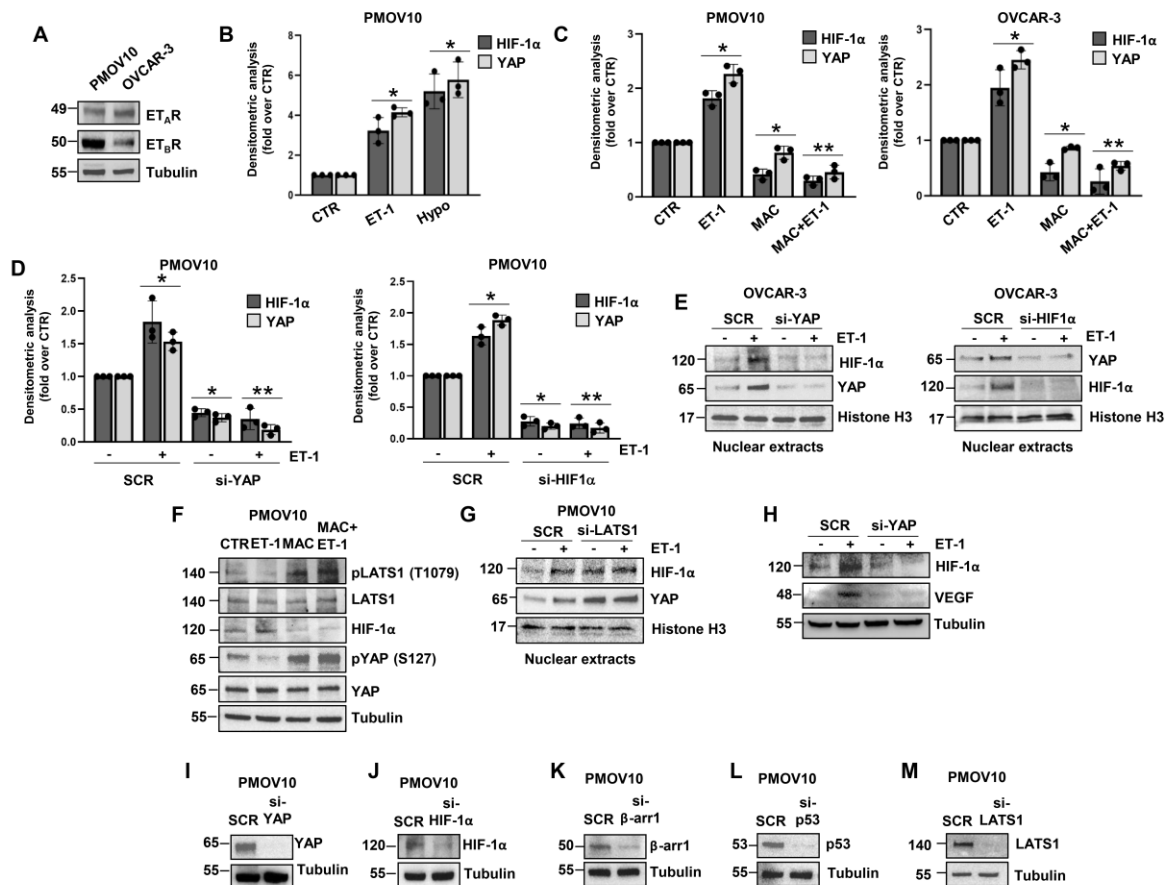

**Fig. S1. PMOV10 and OVCAR-3 express the ET-1R.** A. Immunoblotting (IB) analysis for  $ET_{AR}$  and  $ET_{BR}$  protein expression in patient-derived HG-SOC cells (PMOV10) and HG-SOC cell line OVCAR-3. Tubulin was used as loading control. Representative images of blots of 3 independent experiments are shown. B. Quantification of HIF-1 $\alpha$  and YAP protein expression in nuclear extracts of PMOV10 cells normalized to Histone H3 of IB analyses shown in Figure 1D. Values are the mean  $\pm$ SD expressed as fold induction (\*,  $p < 0.004$  vs. CTR;  $n = 3$ ). C. Quantification of HIF-1 $\alpha$  and YAP protein expression in nuclear extracts of PMOV10 (*left*) and OVCAR-3 (*right*) cells normalized to Histone H3 of IB analyses shown in Figure 1E and F. Values are the mean  $\pm$ SD expressed as fold induction (\*,  $p < 0.02$  vs. CTR; \*\*,  $p < 0.002$  vs. ET-1;  $n = 3$ ). D. Quantification of HIF-1 $\alpha$  and YAP protein expression in nuclear extracts of PMOV10 cells silenced for YAP (*left*) or HIF-1 $\alpha$  (*right*) normalized to histone H3 of IB analyses shown in Figure 1G. Values are the mean  $\pm$ SD expressed as fold induction (\*,  $p < 0.01$  vs. CTR; \*\*,  $p < 0.002$  vs. ET-1;  $n = 3$ ). E. IB analyses for HIF-1 $\alpha$  and YAP

protein expression in nuclear extracts of OVCAR-3 cells stimulated with ET-1 for 2 h and 72 h transfected with SCR, si-YAP (*left*) or si-HIF-1 $\alpha$  (*right*). Histone H3 represents the loading control. F. Expression of pLATS1 (T1079), LATS1, HIF-1 $\alpha$ , pYAP (S127) and YAP proteins analyzed by IB in total extracts of PMOV10 cells stimulated with ET-1 and/or macitentan (MAC) for 2 h. Tubulin represents the loading control. G. IB analysis for HIF-1 $\alpha$  and YAP nuclear expression in PMOV10 cells 72 h silenced for LATS1 and stimulated or not with ET-1 for 2 h. Histone H3 represents the loading control. H. Total extracts of PMOV10 cells with or without YAP silencing for 72 h and stimulated or not stimulated with ET-1 for 48 h were subjected to IB for HIF-1 $\alpha$  and VEGF. Tubulin represents the loading control. I-M. YAP (I), HIF-1 $\alpha$  (J),  $\beta$ -arrestin1 ( $\beta$ -arr1) (K), p53 (L), and LATS1 (M) protein expression in PMOV10 cells silenced or not for YAP (I), HIF-1 $\alpha$  (J),  $\beta$ -arr1 (K), p53 (L), or LATS1 (M) for 72 h. Tubulin represents the loading control. Representative images of blots of 3 independent experiments are shown in E-M.

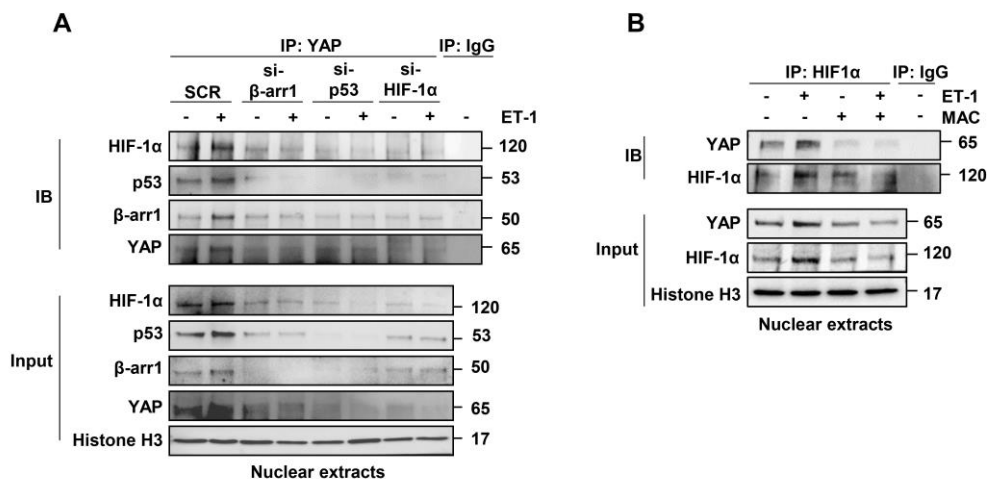

**Fig. S2. ET-1 guides the formation of the multimeric mutp53/YAP/HIF-1 $\alpha$ / $\beta$ -arr1 nuclear complex.** A. Nuclear extracts of PMOV10 cells silenced for  $\beta$ -arr1, p53 and HIF-1 $\alpha$  for 72 h and stimulated with ET-1 for 2 h were IP for YAP using anti-YAP, or anti-IgG and IB using anti-YAP, anti-HIF-1 $\alpha$ , anti-p53, and anti- $\beta$ -arr1 antibodies (Abs). Histone H3 represents the loading control.

B. Nuclear extracts of PMOV10 cells stimulated with ET-1 and/or MAC for 2 h were IP for HIF-1 $\alpha$  using anti-HIF-1 $\alpha$ , or anti-IgG and IB using anti-YAP or anti-HIF-1 $\alpha$  Abs. Histone H3 represents the loading control. Representative images of blots of 3 independent experiments are shown.

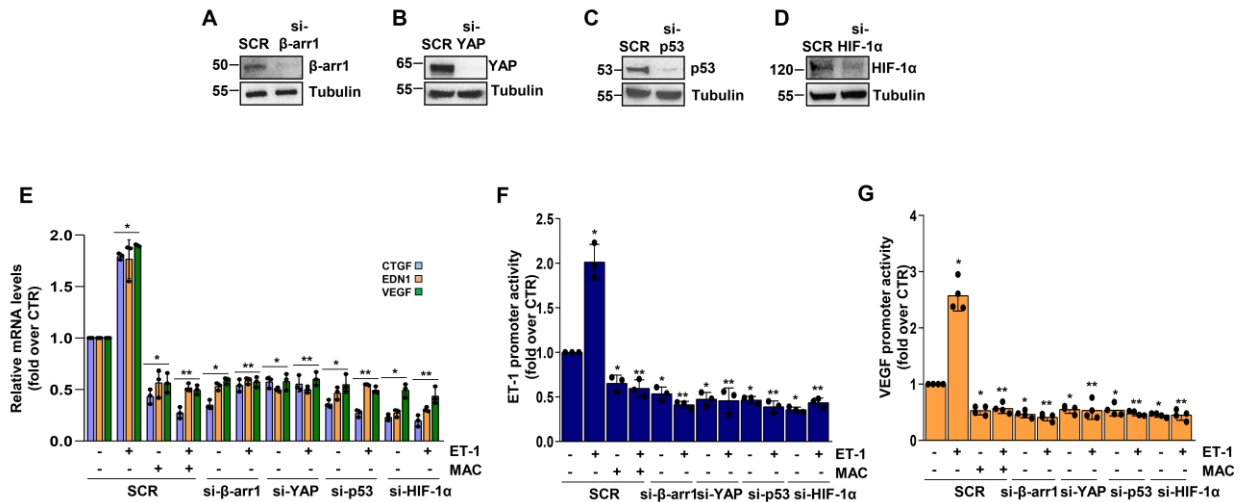

**Fig. S3. mutp53/YAP mediate the ET-1R-induced HIF-1 $\alpha$  transcriptional activity sustaining HG-SOC cell invasion and transendothelial migration.** A-D.  $\beta$ -arrestin1 (A), YAP (B), p53 (C) and HIF-1 $\alpha$  (D) protein expression in OVCAR-3 cells silenced or not for  $\beta$ -arrestin1 (A), YAP (B), p53 (C) and HIF-1 $\alpha$  (D) for 72 h. Tubulin represents the loading control. Representative images of blots of 3 independent experiments are shown in A-D. E. Expression analysis (qRT-PCR) of the mRNA levels of YAP/HIF-1 $\alpha$  target genes, *CTGF*, *EDN1* and *VEGF*, in OVCAR-3 cells stimulated with ET-1 and treated with MAC for 24 h or silenced for  $\beta$ -arr1, YAP, p53 and HIF-1 $\alpha$  for 72 h. Bars are means  $\pm$  SD (\*,  $p < 0.005$  vs. CTR; \*\*,  $p < 0.0005$  vs. ET-1;  $n = 3$ ). F, G. ET-1 promoter activity (F) and VEGF promoter activity (G) measured in OVCAR-3 cells silenced as in E, co-transfected with ET-1 promoter-luc construct (F) or VEGF promoter-luc construct (G) for 24 h, and stimulated with ET-1 and/or MAC for 24 h. Bars are means  $\pm$  SD (\*,  $p < 0.003$  vs. CTR; \*\*,  $p < 0.0005$  vs. ET-1;  $n = 3$ ).

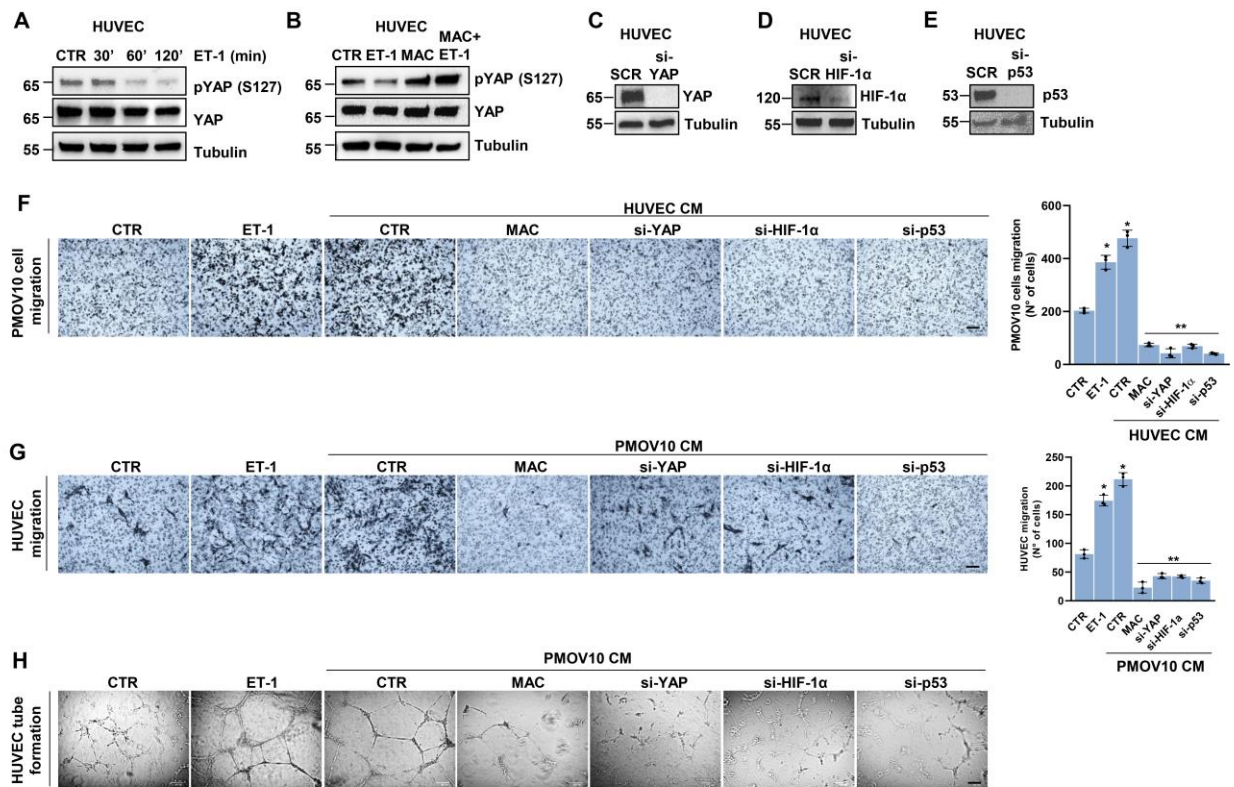

**Fig. S4. ET-1 mediates the HG-SOC/endothelial cells cross-talk through the p53/YAP/HIF-1 $\alpha$  signaling.** A. IB analysis for pYAP (S127) and YAP protein expression in HUVECs stimulated with ET-1 for the indicated times. Tubulin represents the loading control. B. IB analysis for pYAP (S127) and YAP protein expression in total extracts of HUVECs stimulated with ET-1 and/or MAC for 2 h. C-E. HUVECs silenced or not for YAP (C), HIF-1 $\alpha$  (D) or p53 (E) for 72 h were IB for YAP (C), HIF-1 $\alpha$  (D) and p53 (E). Representative images of blots of 3 independent experiments are shown in A-E. F. Migration assay of PMOV10 cells stimulated or not with ET-1 or with conditioned media (CM) from HUVECs treated or not with MAC for 24 h or silenced for YAP, HIF-1 $\alpha$  or p53 for 72 h. Representative images of the migrating cells were photographed (scale bar: 100 $\mu$ m, magnification 20X) (*left panels*) or counted (*right graph*). Bars are means  $\pm$  SD (\*  $p < 0.0004$  vs. CTR; \*\*  $p < 0.0002$  vs. HUVEC CM treated cells;  $n = 3$ ). G. Migration assay of HUVECs stimulated or not with ET-1, or with CM from PMOV10 cells treated or not with MAC for 24 h, or silenced for YAP, HIF-1 $\alpha$  or p53 for 72 h. Representative images of the migrating cells were photographed (scale bar: 100 $\mu$ m,

magnification 20X) (*left panels*) or counted (*right graph*). Bars are means  $\pm$  SD (\*  $p < 0.0004$  vs. CTR; \*\*  $p < 0.0002$  vs. PMOV10 CM treated cells;  $n = 3$ ). H. Tube formation assay of HUVECs stimulated as in G. Representative images of the tubes were photographed (scale bar: 100 $\mu$ m, magnification 20X).

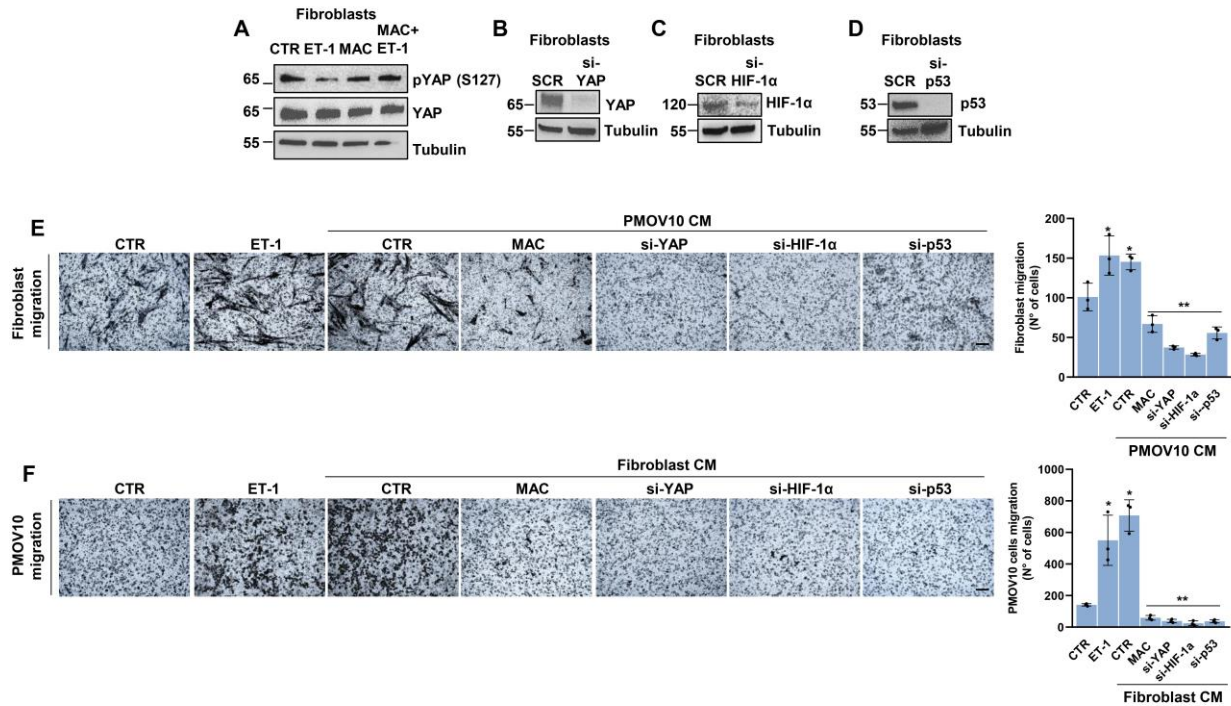

**Fig. S5. ET-1 mediates the HG-SOC/fibroblasts cross-talk through the p53/YAP/HIF-1 $\alpha$  signaling.** A. IB analysis for pYAP (S127) and YAP protein expression in total extracts of fibroblasts stimulated with ET-1 and/or MAC for 2 h. Tubulin represents the loading control. Representative images of blots of 3 independent experiments are shown. B-D. fibroblasts silenced or not for YAP (B), HIF-1 $\alpha$  (C) or p53 (D) for 72 h were IB with anti-YAP (B), anti-HIF-1 $\alpha$  (C), or anti-p53 (D) abs. Tubulin represents the loading control. Representative images of blots of 3 independent experiments are shown in A-D. E. Migration assay of fibroblasts stimulated or not with ET-1 or with CM from PMOV10 cells treated or not with MAC for 24 h or silenced for YAP, HIF-1 $\alpha$  or p53 for 72 h. Representative images of the migrating cells were photographed (scale bar: 100 $\mu$ m, magnification 20X) (*left panels*) or counted (*right graph*). Bars are means  $\pm$  SD (\*  $p < 0.05$  vs. CTR; \*\*  $p < 0.0008$



vs. PMOV10 CM treated cells;  $n=3$ ). F. Migration assay of PMOV10 cells stimulated or not with ET-1 or with CM from fibroblasts treated or not with MAC for 24 h or silenced for YAP, HIF-1 $\alpha$  or p53 for 72 h. Representative images of the migrating cells were photographed (scale bar: 100 $\mu$ m, magnification 20X) (*left panels*) or counted (*right graph*). Bars are means  $\pm$  SD (\*  $p<0.02$  vs. CTR; \*\* $p<0.0005$  vs. fibroblast CM treated cells;  $n=3$ ).

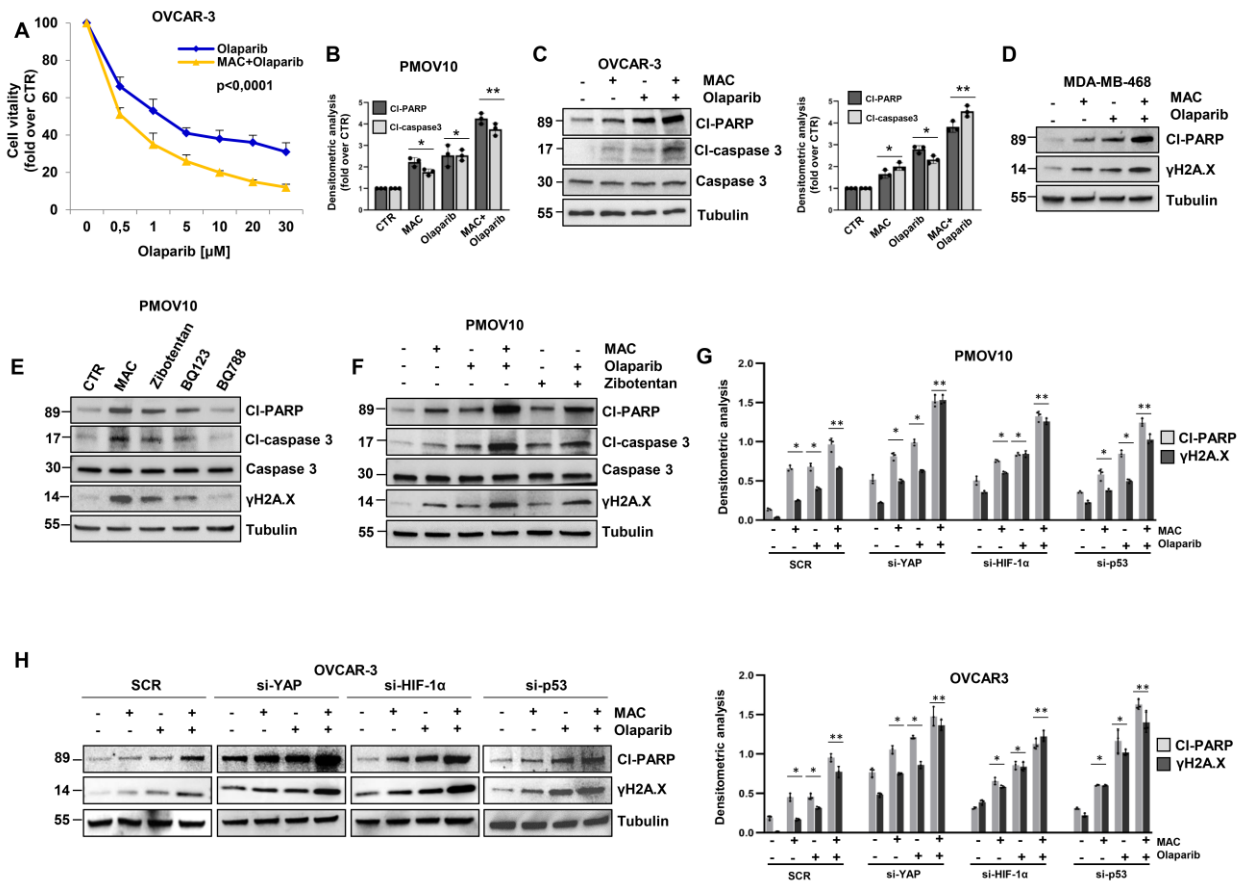

**Fig. S6. Macitentan, interfering with mutp53/YAP/HIF-1 $\alpha$  oncogenic network, enhances HG-SOC cells sensitivity to olaparib inducing DNA damage and apoptosis.** A. Effect of exposure to different concentrations of olaparib (from 0,5 to 30  $\mu$ M) alone or in combination with MAC (1 $\mu$ M) after 48 h on cell vitality of OVCAR-3. Data points are means  $\pm$  SD (\*,  $p<0.0001$  vs. olaparib;  $n=3$ ). B. Quantification of cl-PARP and cl-caspase 3 total extracts of PMOV10 cells treated with MAC or olaparib (20  $\mu$ M), alone or in combination for 48 h normalized to tubulin of IB analyses shown in Figure 6B. Values are the mean  $\pm$ SD expressed as fold induction (\*,  $p<0.006$  vs. CTR; \*\*,  $p<0.006$

vs. olaparib;  $n=3$ ). C. IB analysis for cl-PARP, cl-caspase 3 and caspase 3 in total extracts of OVCAR-3 cells treated as in B. Tubulin represents the loading control. Right graph represents the blots quantification. Values are the mean  $\pm$ SD expressed as fold induction (\*,  $p<0.003$  vs. CTR; \*\*,  $p<0.004$  vs. olaparib;  $n=3$ ). D. IB analysis for cl-PARP and  $\gamma$ H2A.X in total extracts of MDA-MB-468 breast cancer cells treated as in B. Tubulin represents the loading control. E. IB analysis for cl-PARP, cl-caspase 3, caspase 3 and  $\gamma$ H2A.X in total extracts of PMOV10 cells treated with MAC, zibotentan, BQ123 or BQ788 (1 $\mu$ M) for 48h. Tubulin represents the loading control. F. IB analysis for cl-PARP, cl-caspase 3, caspase 3 and  $\gamma$ H2A.X in total extracts of PMOV10 cells treated with MAC or zibotentan, alone or in combination with olaparib for 48h. Tubulin represents the loading control. G. Quantification of cl-PARP and  $\gamma$ H2A.X in total extracts of PMOV10 cells treated as in B and silenced or not for YAP, HIF-1 $\alpha$  or p53 for 72h of IB analyses shown in Figure 6D. Values are the mean  $\pm$ SD expressed as fold induction (\*,  $p<0.002$  vs. CTR; \*\*,  $p<0.003$  vs. olaparib;  $n=3$ ). H. IB analysis for cl-PARP, and  $\gamma$ H2A.X in total extracts of OVCAR-3 cells treated and transfected as in G. Tubulin represents the loading control. Right graph represents the blots quantification. Values are the mean  $\pm$ SD expressed as fold induction (\*,  $p<0.009$  vs. CTR; \*\*,  $p<0.0004$  vs. olaparib;  $n=3$ ). Representative images of blots of 3 independent experiments are shown in C, D-F and H.
